# Supplementary material
Source: PubMed Central journal article supplement (PMC434424)
Supplement: nar_32_10_3180__1.pdf [file nar_32_10_3180__1.pdf]

Fig. 7S-1.

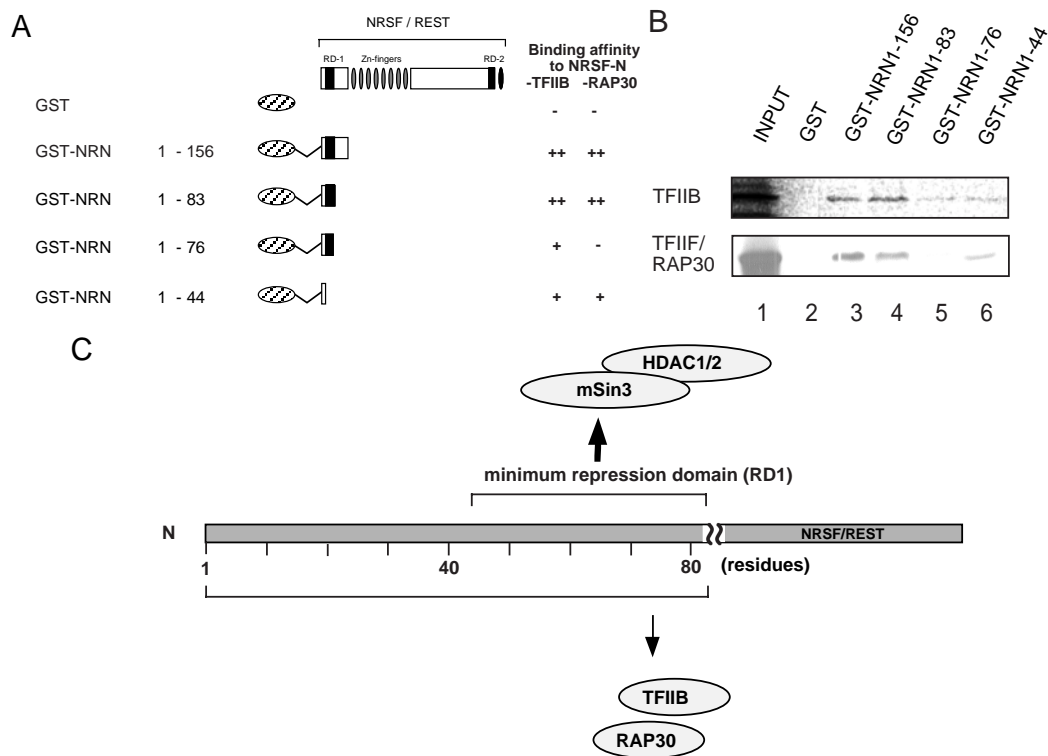

**Interaction regions of NRSF-N terminal domain for TFIIB or TFIIF/RAP30.**

(A) Schematic representation of the various forms of GST-fused NRSF proteins used in “B”. (B) Interaction of *in vitro*-translated TFIIB- or TFIIF/RAP30-binding region with the NRSF-N terminal regions. *In vitro* binding, the so-called GST-pull-down assay, was tested against a series of deletion constructs (NRN1-44, 76, 83, and 156) or GST as a negative control.

Fig. 7S-2

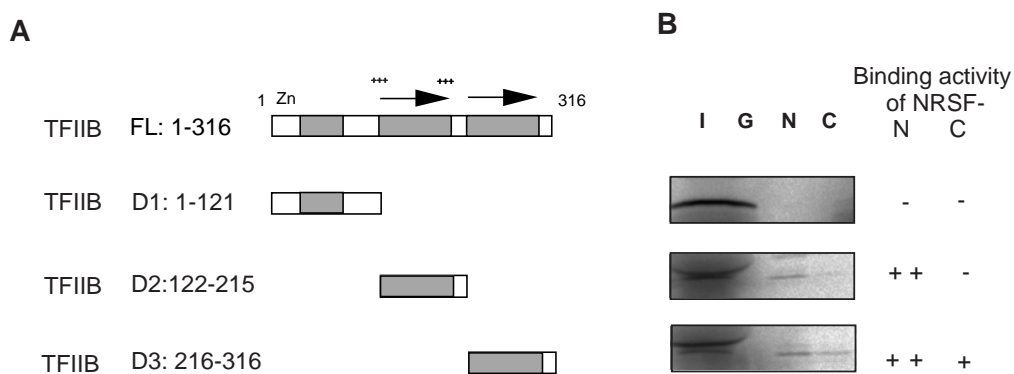

**TFIIB interacts with NRSF-RD1 through the first and/or the second direct repeat *in vitro*.** (A) Schematic diagram of TFIIB constructs. Gray boxes show the regions conserved evolutionarily. Upper diagram indicates the positions of a Zn-finger motif (Zn), Direct repeats (arrows), and basic repeats (+++). (B) <sup>35</sup>S-labeled Flag-tagged TFIIB was incubated with GST-fused NRSF-N (N) or -C (C). Binding activity is shown in the right panel.
